# Supplementary material
Source: PubMed Central journal article supplement (PMC3501641)
Supplement: supp_blood-2012-02-408252_blood-2012-02-408252-1.pdf [file supp_blood-2012-02-408252_blood-2012-02-408252-1.pdf]

## **Supplemental Materials and Methods:**

### Mice and Infection

At least one male and four female *B.malayi* parasites were surgically implanted into the peritoneal cavity of recipient mice in a total volume of 0.5 mL RPMI supplemented with 0.25 U/mL Penicillin and 100 mg/mL Streptomycin (Gibco). Control mice underwent sham surgery with an equal volume of medium but no parasites. Three days prior to necropsy control mice were additionally injected i.p. with 800  $\mu$ L 4% Brewer modified thioglycollate medium (BD Biosciences). Three to 21 days post surgery mice were killed and the peritoneal cavity flushed with 10mL cold medium. For *in vitro* experiments mice were injected with 800  $\mu$ L 4% thioglycollate three days prior to necropsy without prior surgery.

### RNA-isolation

Total RNA was isolated from M $\Phi$  lysed in Qiazol using the miRNEasy-kit (Qiagen) according to manufacturers instructions. Briefly the RNA from lysed cells was precipitated using Phenol-Chloroform-extraction and the aqueous supernatant purified over a spin-column. RNA-content was determined using a NanoDrop (Thermo Scientific).

### Quantitative RT-PCR

For the analysis of miRNA expression by qRT-PCR the TaqMan<sup>®</sup> MicroRNA Reverse Transcription Kit with miRNA-specific TaqMan<sup>®</sup> MicroRNA Assays (Applied Biosystems) was used following the manufacturer's instructions. Briefly 5-10 ng of total

RNA were coincubated with 2-3  $\mu$ L miRNA-specific Primers (Assay-ID miR-16: 000391; miR-125b: 000449; miR-146a: 000468; miR-199b: 001131; miR-378: 002243; snoRNA135: 001230; snoRNA234: 001234) and cDNA generated in the presence of RNase-inhibitors. Detection of successfully transcribed products was carried out using TaqMan®2x Universal PCR Mix (no AmpErase® UNG; Applied Biosystems) in combination with miRNA-specific primers and TaqMan®-probes and quantified on a Lightcycler® 480 (Roche Applied Sciences). Fold change over medium/naïve controls was calculated using the  $\Delta\Delta$ ct method utilizing expression of miR-16 as the house keeping gene.

For the measurement of mRNA-expression, total RNA was converted to cDNA utilizing BioScript™ Reverse Transcriptase (Bioline) and p(dT)<sub>15</sub> Primers (Roche Applied Science). Expression levels were quantified using LightCycler® 480 SYBR Green I Master (Roche Applied Science). A list of sequences of mRNA-specific, intron-spanning primers used can be found in supplementary table S1. Measurements were performed on a Lightcycler® 480 (Roche Applied Science). Expression was normalized against *Gapdh* or *Anxa-6* expression and is depicted as fold change over medium/naïve controls.

#### Dual-Luciferase Reporter Assay

Transfected cells were lysed in 50  $\mu$ L passive lysis buffer and firefly luciferase activity assessed by mixing 10  $\mu$ L lysate with 50  $\mu$ L Luciferase Assay Reagent II and resulting luminescence measured on a LumiStar luminometer (BMG Labtechnologies). Subsequently 50  $\mu$ L per sample Stop&Glo® Reagent were added and *Renilla* luciferase activity assessed using the same luminometer.

## Flow cytometry

For the analysis of STAT-6 phosphorylation thioglycollate-elicited peritoneal M $\Phi$  were stimulated with rIL-4 or medium for 24 hours as described above. Subsequently remaining stimulus was washed off and the cells incubated without stimulus for 1 hour prior to re-stimulation with rIL-4 for 5 – 60 min. Afterwards cells were fixed with 2% paraformaldehyde (Sigma Aldrich) for 10 min at RT, subjected to surface staining for F4/80 and CD11b (Biolegend) and permeabilised with methanol (Sigma Aldrich) at 4 °C for 30 min prior to staining with anti-phosphoSTAT-6 antibodies (BD Phosflow™ STAT6 (pY641), BD Pharmingen). As negative control appropriate isotype staining was performed. Samples were acquired on a BD FACSCanto™ II (BD Pharmingen) and post-acquisition analysis performed using FlowJo v8.8.6 (Tree Star Inc.). Data are depicted as median fluorescence intensity.

## Protein extraction and Western blotting

For the determination of Akt-1 and Grb2 protein levels RAW264.7 cells were transfected as described above and 12 hours post transfection cells were lysed using passive lysis buffer (Promega) supplemented with 1% protease inhibitor cocktail (Sigma Aldrich). Protein concentrations were determined using the Coomassie Plus Bradford reagent assay (Thermo Scientific) and equal amounts separated on NuPage® 4-12% Bis-Tris gels (Life Technologies). Proteins were transferred to Hybond ECL membranes (GE Healthcare) and specific protein bands detected using monoclonal antibodies against Grb2 or Akt-1 simultaneously with  $\beta$ -actin (all Abs from Cell Signaling Technology). Hybridisations

were done 1:1000 in 5% milk, 1x TBS, 0.1% Tween-20 overnight at 4°C. Anti-rabbit IgG (H+L) DyLight800™ Ab (Thermo Scientific) was added 1:1000 for 2 hours at room temperature. Signals were visualized utilizing the Odyssey® Imager (Li-Cor) and densitometric analysis carried out using ImageJ (<http://rsb.info.nih.gov/ij/index.html>) following the method described by Luke Miller (<http://lukemiller.org/index.php/2010/11/analyzing-gels-and-western-blots-with-image-j/>).

**Table S1:** List of Primers used for quantitative RT-PCR

| Gene-Symbol      | direction | Primer-sequence                   |
|------------------|-----------|-----------------------------------|
| <i>Akt1</i>      | fwd       | 5'-CATGAACGACGTAGCCATTG-3'        |
|                  | rev       | 5'-CCATCGTTCTTGAGGAGGAA-3'        |
| <i>Arg1</i>      | fwd       | 5'-CAGAAGAATGGAAGAGTCAG-3'        |
|                  | rev       | 5'-CAGATATGCAGGGAGTCACC-3'        |
| <i>Bactin</i>    | fwd       | 5'-TGGAATCCTGTGGCATCCATGAAAC-3'   |
|                  | rev       | 5'-TAAAACGCAGCTCAGTAACAGTCCG      |
| <i>Ccna2</i>     | fwd       | 5'-CTTGGCTGCACCAACAGTAA-3'        |
|                  | rev       | 5'-CAAACCTCAGTTCTCCCAAAAACA-3'    |
| <i>Cd36</i>      | fwd       | 5'-TGGCCTTACTTGGGATTGG-3'         |
|                  | rev       | 5'-CCAGTGTATATGTAGGCTCATCCA-3'    |
| <i>Chi3l3</i>    | fwd       | 5'-TCACAGGTCTGGCAATTCTTCTG-3'     |
|                  | rev       | 5'-TTGTCCTTAGGAGGGCTTCCTC-3'      |
| <i>Gapdh</i>     | fwd       | 5'-ATGACATCAAGAAGGTGGTG-3'        |
|                  | rev       | 5'-CATACCAGGAAATGAGCTTG-3'        |
| <i>Grb2</i>      | fwd       | 5'-TGACCCCCAGGAGGATGGCG-3'        |
|                  | rev       | 5'-AACATGCCGGTCTGCCCGTG-3'        |
| <i>Nos2</i>      | fwd       | 5'-CCCGGAAGGTTTGTACAGC-3'         |
|                  | rev       | 5'-AAGGGGACGAACTCAGTGG-3'         |
| <i>Pparg1b</i>   | fwd       | 5'-GACGTGGACGAGCTTTCCT-3'         |
|                  | rev       | 5'-GAGCGTCAGAGCTTGCTGTT-3'        |
| <i>pan-Pparg</i> | fwd       | 5'-TTATAGCTGTCATTATTCTCAGTGGAG-3' |
|                  | rev       | 5'-GACTCTGGGTGATTCAGCTTG-3'       |
| <i>Retnla</i>    | fwd       | 5'-TATGAACAGATGGGCCTCCT-3'        |
|                  | rev       | 5'-GGCAGTTGCAAGTATCTCCAC-3'       |

**Table S2: microRNA-array results.** Log2 ratio of microRNAs found to be significantly differentially expressed in BALB/c NeMΦ as compared to Thio-MΦ (left column) or IL-4Rα<sup>-/-</sup> NeMΦ (right column). y: microRNA selected for qRT-PCR verification. – no significant change or not chosen for validation.

| microRNA-ID<br>(Array)<br>miRBase 13 | microRNA-ID<br>(current)<br>miRBase 18 | Log2<br>NeMΦ/ThioMΦ | Log2<br>BALB/c / IL-<br>4Rα <sup>-/-</sup> | Selected for<br>qRT-validation |
|--------------------------------------|----------------------------------------|---------------------|--------------------------------------------|--------------------------------|
| miR-18a                              | miR-18a-5p                             | -1.31               | -                                          | y                              |
| miR-20a                              | miR-20a-5p                             | -                   | -0.60                                      | -                              |
| miR-125a-5p                          | miR-125a-5p                            | -                   | -1.09                                      | -                              |
| miR-125b-5p                          | miR-125b-5p                            | -                   | 1.91                                       | y                              |
| miR-141                              | miR-141-3p                             | -1.14               | -                                          | -                              |
| miR-146a                             | miR-146a-5p                            | -1.46               | -                                          | y                              |
| miR-150                              | miR-150-5p                             | -                   | -1.97                                      | y                              |
| miR-199b*                            | miR-199b-5p                            | -                   | 2.04                                       | y                              |
| miR-221                              | miR-221-3p                             | -1.53               | -                                          | y                              |
| miR-222                              | miR-222-3p                             | -1.27               | -                                          | y                              |
| miR-223                              | miR-223-3p                             | -                   | 1.22                                       | -                              |
| miR-291a-5p                          | miR-291a-5p                            | -                   | -0.75                                      | -                              |
| miR-342-3p                           | miR-342-3p                             | -1.51               | -                                          | y                              |
| miR-378                              | miR-378-3p                             | 2.10                | 2.28                                       | y                              |
| miR-467b                             | miR-476b-5p                            | -1.10               | -                                          | -                              |
| miR-689                              | -                                      | -                   | -2.56                                      | y                              |
| miR-710                              | miR-710                                | -                   | -1.06                                      | -                              |
| miR-720                              | miR-720                                | -                   | 1.03                                       | -                              |
| miR-744                              | miR-744-5p                             | -                   | -0.85                                      | -                              |

# Suppl. Fig.1

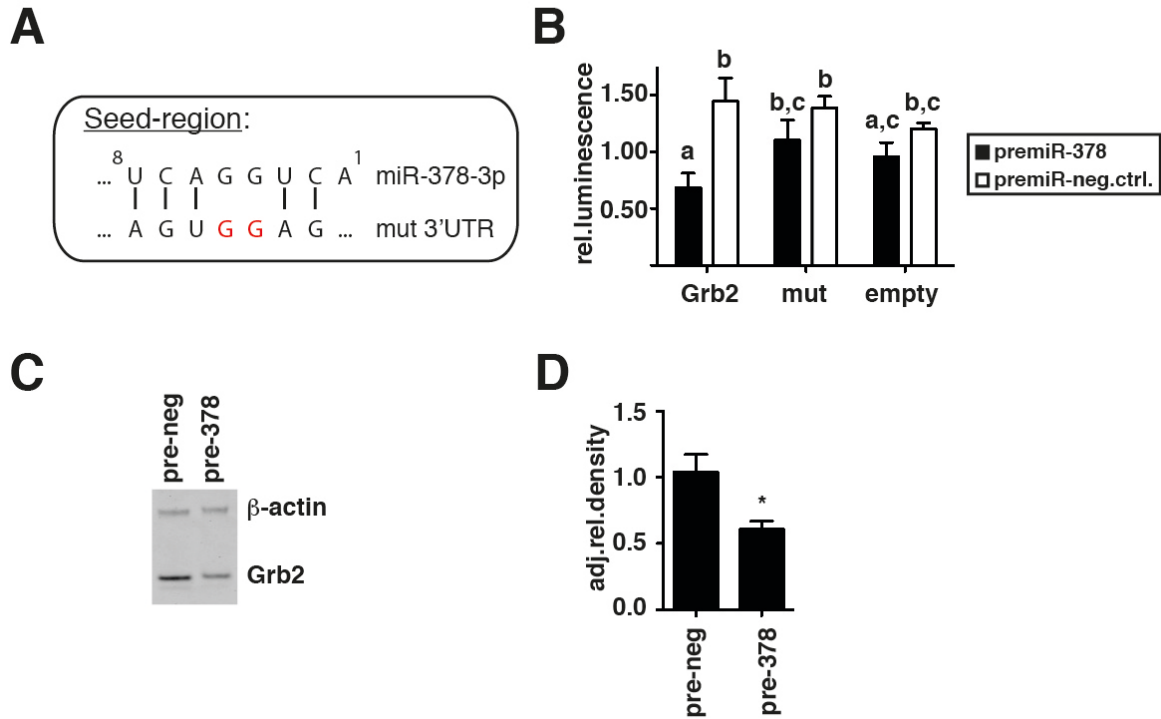

Suppl. Figure 1: miR-378-3p targets the IL-4R/PI3K/Akt-signaling pathway.

(A) Schematic depiction of the mutated miR-378-3p binding site in 3'UTR-sequences used in this study.

(B) Luciferase-assay using the 3'UTR of wildtype Grb2 (Grb2) or constructs with mutated seed-region binding sites for both predicted miR-378-3p binding sites (mut) or without insert (empty). Data indicates cotransfection with a miR-378-3p mimic (black bars) or a scrambled control (open bars). Data is pooled from 4 separate experiments and depicted as relative luminescence compared to no-RNA transfected controls. Bars not connected by the same letters are statistically significantly different.

(C) Representative WesternBlot analysis of RAW264.7 cells 12h post transfection with a mimic (pre-378) of miR-378-3p or appropriate negative controls (pre-neg). Samples were separated on a 4-12% Gradient gel and stained for Grb2 and b-actin at the same time.

(D) Densitometric analysis of the samples analysed in (C). Data representative of four separate experiments. \*P < .05
